# Supplementary material
Source: PubMed Central journal article supplement (PMC9185752)
Supplement: NIHMS1748001-supplement-8.pdf [file NIHMS1748001-supplement-8.pdf]

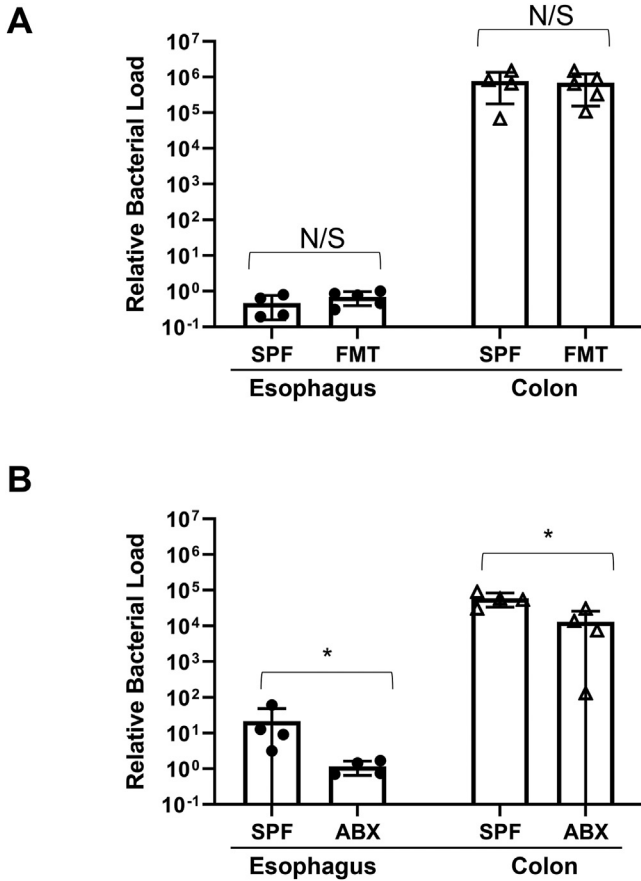

**Supplementary Figure 1.** Relative tissue bacterial load. (A) Bacterial load from PHF SPF FMT mice and (B) antibiotic-treated mice in esophagus and colon. Relative bacterial load was examined by quantitative reverse transcriptase polymerase chain reaction compared with host genomic DNA via the  $2^{-\Delta\Delta C_t}$  method. Data are from corresponding esophageal microbiota analysis (Figures 1 and 5). ABX, antibiotics. Data are represented as mean  $\pm$  standard deviation and are pooled from 3 independent experiments. Statistics by unpaired *t* test. \* $P \leq .05$ ; N/S, nonsignificant.

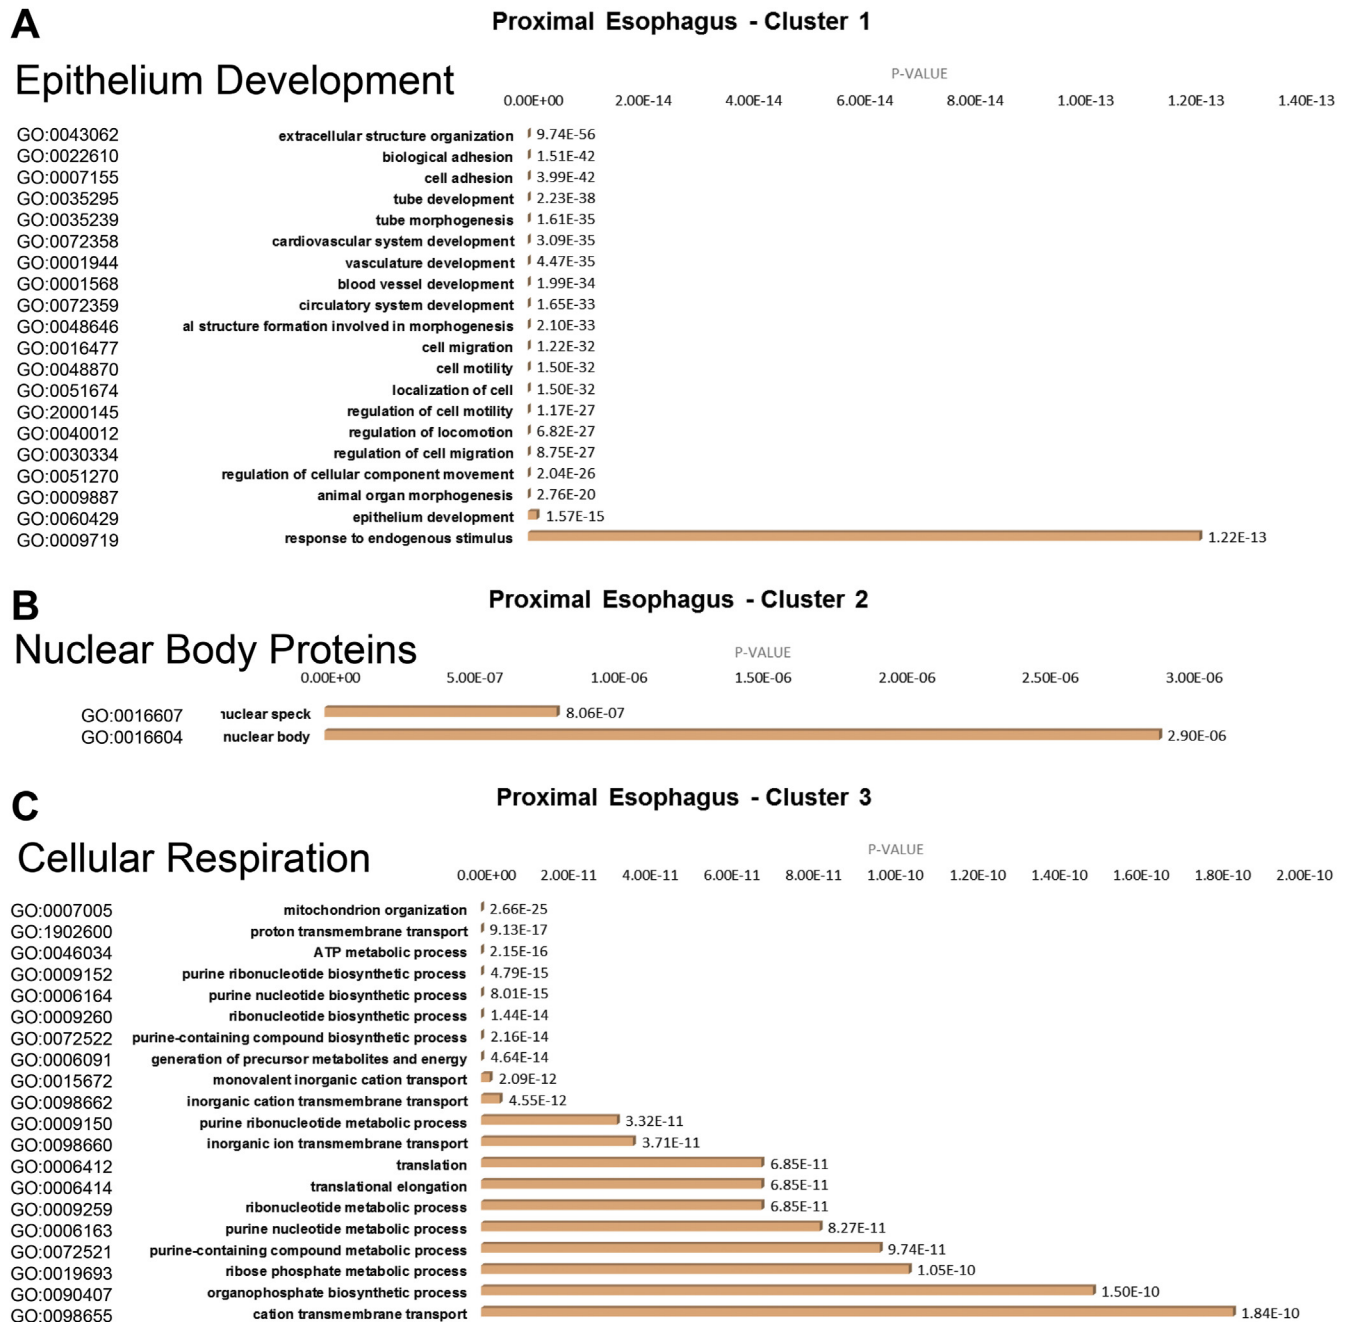

**Supplementary Figure 2.** Gene ontology (GO) functional enrichment analysis of gene clusters differentially expressed due to colonization. Differentially expressed genes in the PE (A–C) and DE (D–F) as measured by RNA-seq in Figure 2 were analyzed with TOPPFUN (false discovery rate [FDR]-adjusted  $P < .05$  and gene limit  $n \leq 2000$ ), and top significantly enriched GO terms with corresponding  $P$  values were plotted.

**D**

**Distal Esophagus - Cluster 1**

**Epithelium Development**

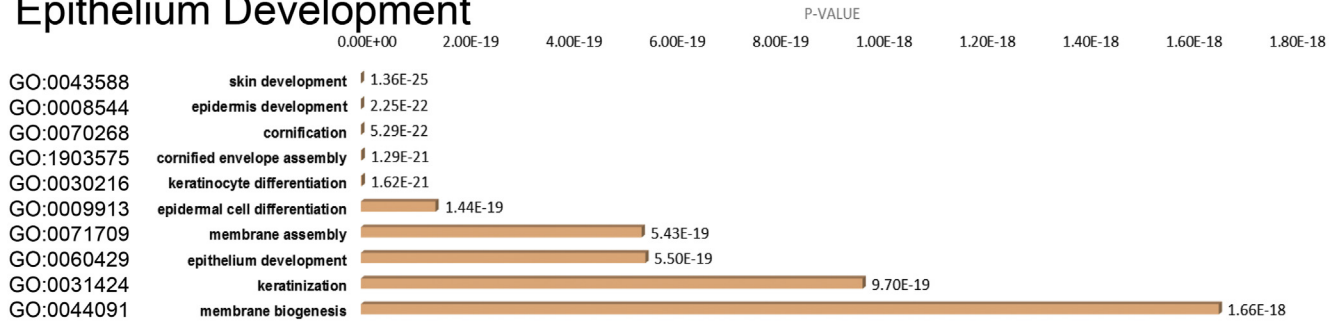

**E**

**Distal Esophagus - Cluster 2**

**Cell Adhesion**

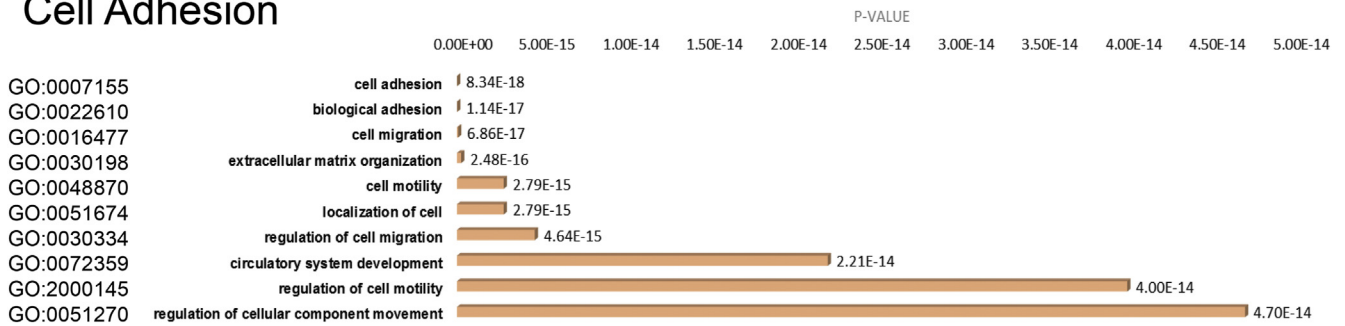

**F**

**Distal Esophagus - Cluster 3**

**Histone Acetylation**

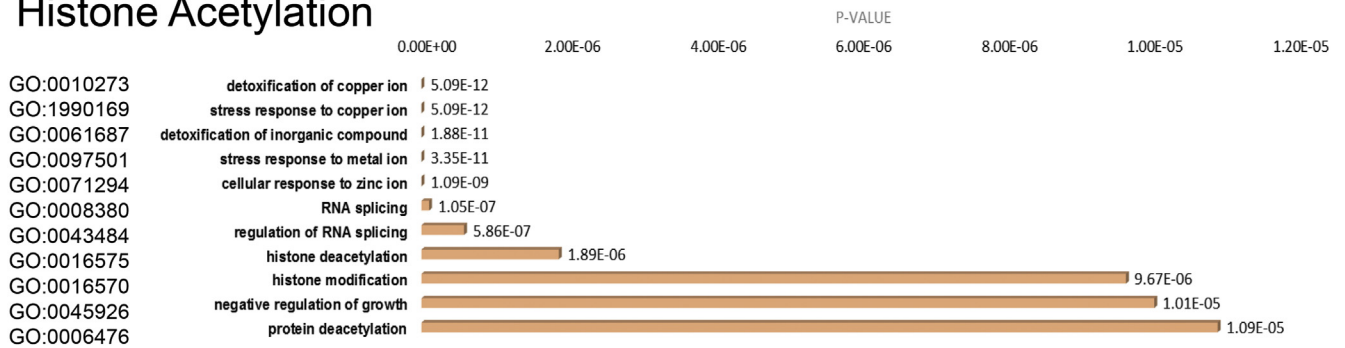

Supplementary Figure 2. continued

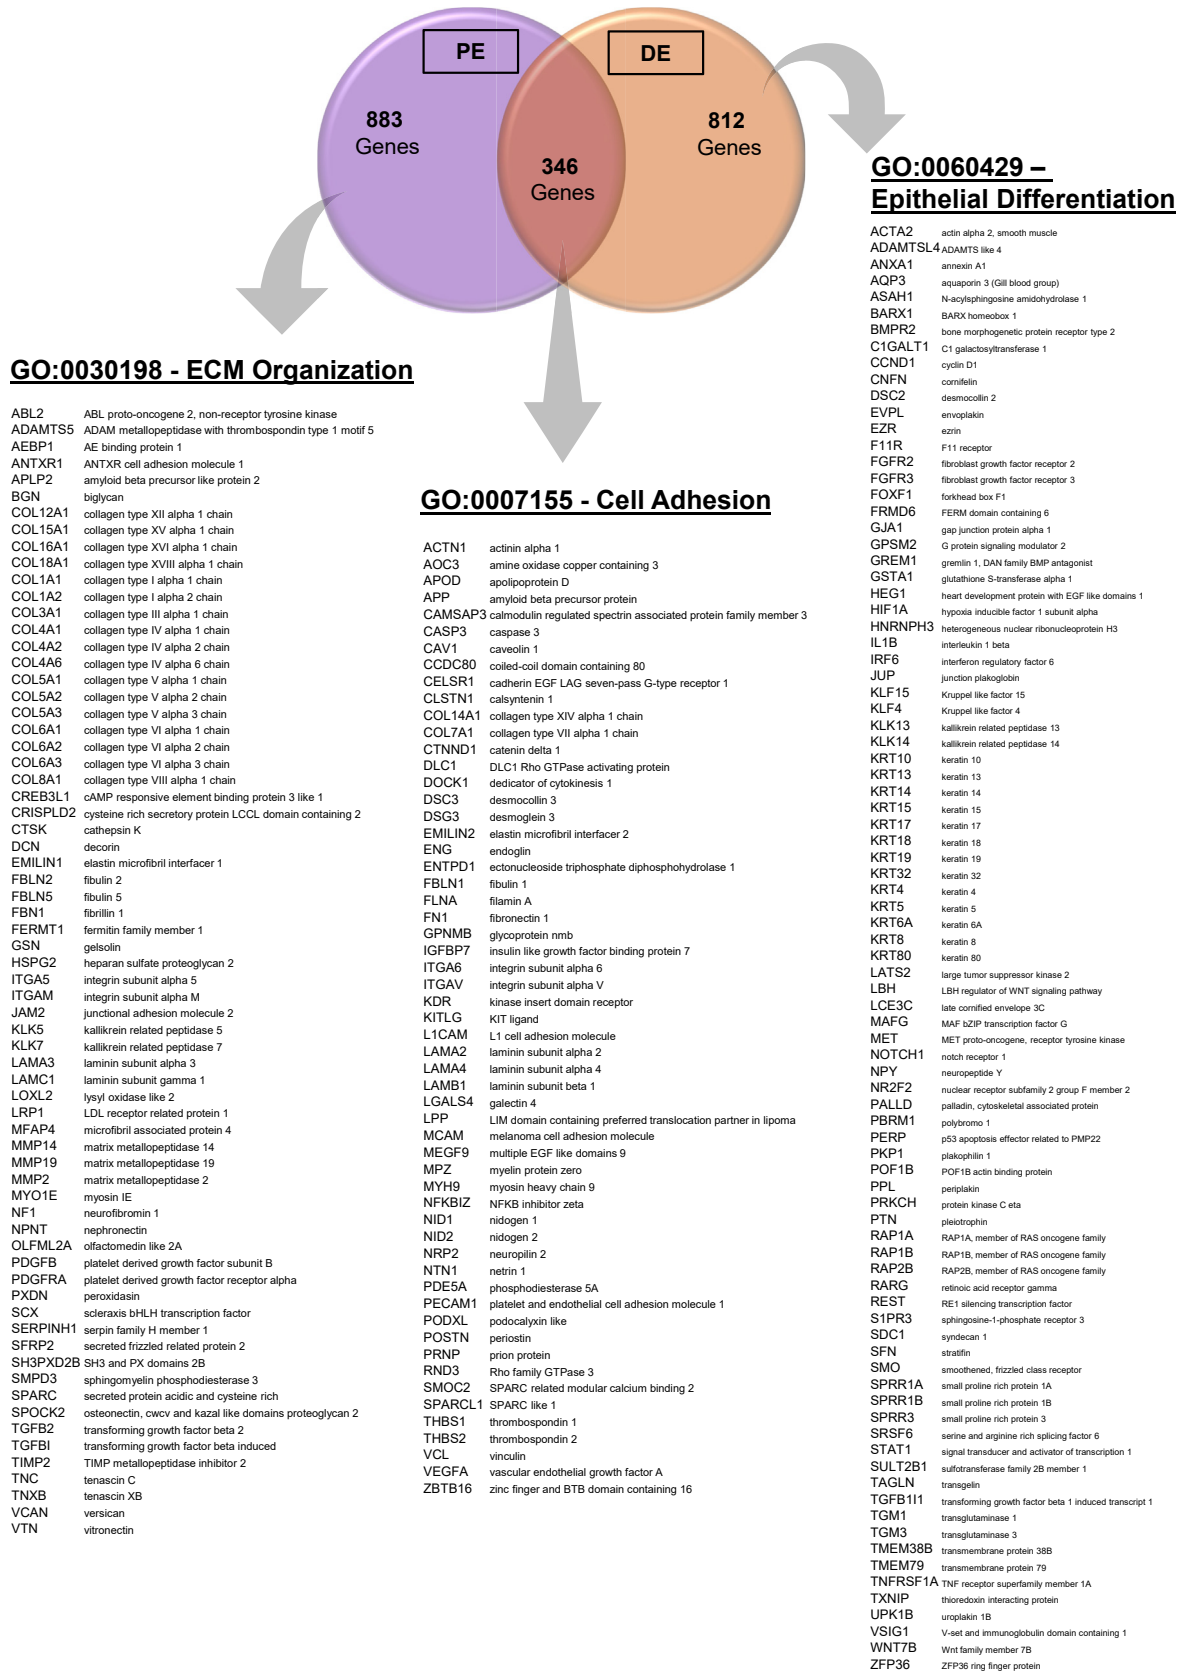

**Supplementary Figure 3.** Gene ontology (GO) functional enrichment analysis of genes differentially expressed due to colonization. Differentially expressed genes by RNA-seq from the PE and DE (Figure 2B; Supplementary Tables 1–2) were integrated, and common and unique gene groups were analyzed with TOPPFUN (FDR-adjusted  $P < .05$  and gene limit  $n \leq 2000$ ). The top representative, significantly enriched GO term with corresponding genes from input was summarized for each group. The complete GO functional analysis of gene groups is in Supplementary Table 3. ECM, extracellular matrix.

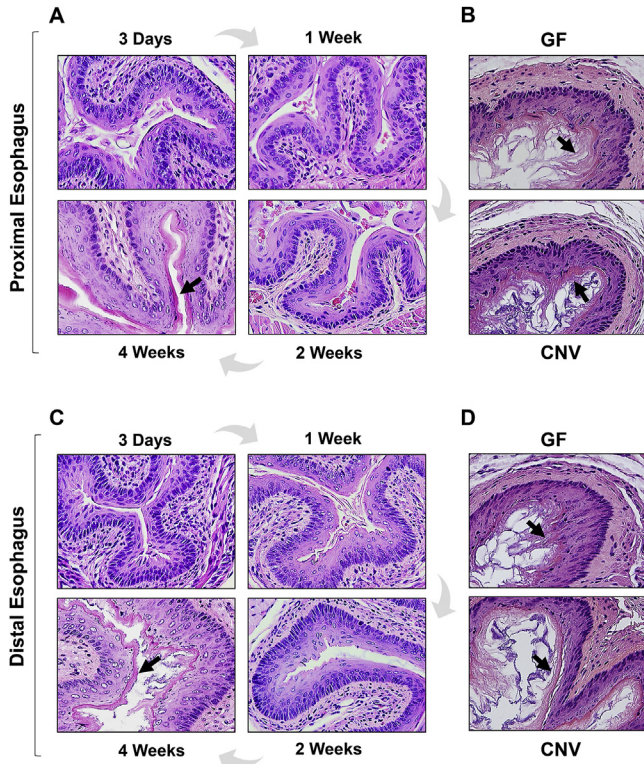

**Supplementary Figure 4.** Esophageal tissue morphology as a function of microbiota colonization. H&E staining of proximal (A, B) and distal (C, D) esophagus ( $\times 20$  magnification). Tissues obtained from SPF (A, C) and GF and CNV (B, D) mice. Images are representative from 3 independent experiments; n are for each proximal and distal site: 3 days, n = 10; 1 week, n = 6; 2 weeks, n = 10; 4 weeks, n = 9; GF, n = 9; CNV, n = 9.



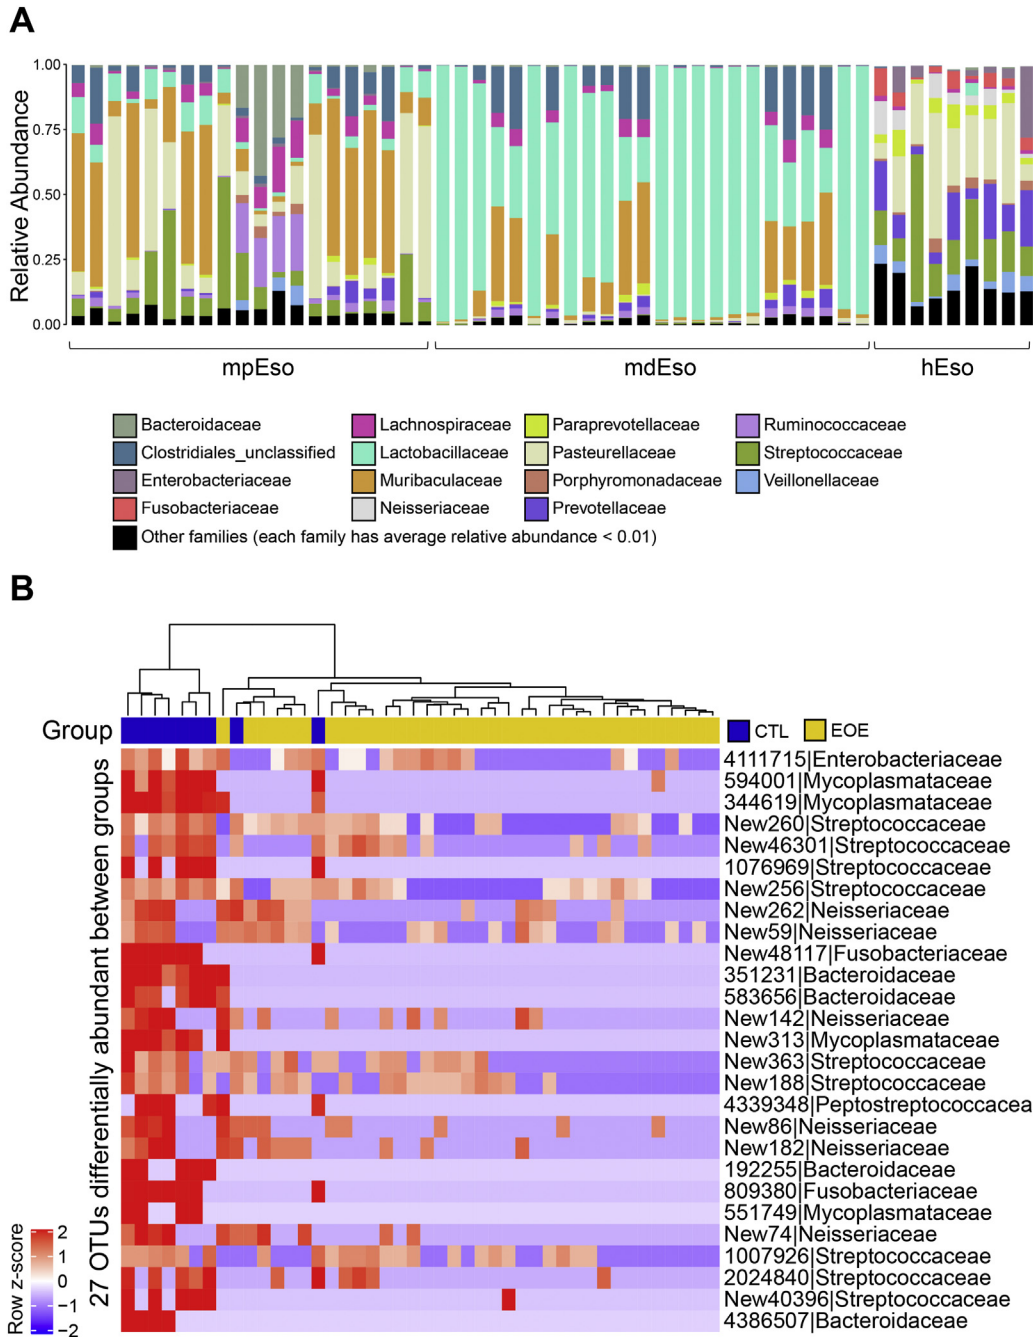

**Supplementary Figure 5.** Mouse and human esophageal microbiota at homeostasis and in patients with EoE. (A) 16S rRNA analysis from murine proximal (mpEso) and distal (mdEso) esophagi of SPF littermates from Figure 4 and Supplementary Table 4 compared with non-EoE human samples (Supplementary Table 5). Taxonomic composition is represented at the family level, where each vertical bar represents 1 individual mouse or human. (B) 16S rRNA analysis from patients with EoE and human non-EoE controls (Supplementary Table 5). Heatmap of differentially abundant OTUs between sites (DS-FDR 0.10; Supplementary Table 5) labeled at the individual OTU level (right). Mouse data are pooled from 3 independent experiments (A); n = 24 for each site (48 total samples): 24 for mdEso and 24 for mpEso. Human data obtained from n = 9 control and n = 35 patients with EoE. CTL, control; DS-FDR, discrete false discovery rate; EoE, Eosinophilic esophagitis; hEso, human esophagus.

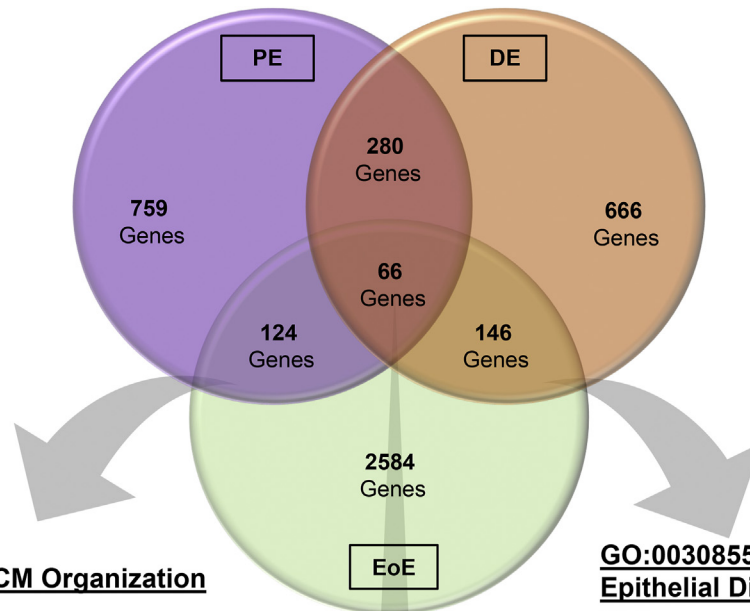

**GO:0030198 - ECM Organization**

|                 |                                                          |
|-----------------|----------------------------------------------------------|
| <b>ADAMTS5</b>  | ADAM metallopeptidase with thrombospondin type 1 motif 5 |
| <b>COL12A1</b>  | collagen type XII alpha 1 chain                          |
| <b>COL18A1</b>  | collagen type XVIII alpha 1 chain                        |
| <b>COL1A1</b>   | collagen type I alpha 1 chain                            |
| <b>COL1A2</b>   | collagen type I alpha 2 chain                            |
| <b>COL3A1</b>   | collagen type III alpha 1 chain                          |
| <b>COL4A6</b>   | collagen type IV alpha 6 chain                           |
| <b>COL6A1</b>   | collagen type VI alpha 1 chain                           |
| <b>COL6A2</b>   | collagen type VI alpha 2 chain                           |
| <b>COL6A3</b>   | collagen type VI alpha 3 chain                           |
| <b>CREB3L1</b>  | cAMP responsive element binding protein 3 like 1         |
| <b>CTSK</b>     | cathepsin K                                              |
| <b>EMILIN1</b>  | elastin microfibril interfacer 1                         |
| <b>FBN1</b>     | fibrillin 1                                              |
| <b>ITGAM</b>    | integrin subunit alpha M                                 |
| <b>KLK5</b>     | kallikrein related peptidase 5                           |
| <b>MMP14</b>    | matrix metallopeptidase 14                               |
| <b>MMP19</b>    | matrix metallopeptidase 19                               |
| <b>PDGFB</b>    | platelet derived growth factor subunit B                 |
| <b>PDGFRA</b>   | platelet derived growth factor receptor alpha            |
| <b>PXDN</b>     | peroxidasin                                              |
| <b>SH3PXD2B</b> | SH3 and PX domains 2B                                    |
| <b>TIMP2</b>    | TIMP metallopeptidase inhibitor 2                        |

**GO:0030855 – Epithelial Differentiation**

|                |                                                   |
|----------------|---------------------------------------------------|
| <b>CNFN</b>    | cornifelin                                        |
| <b>DSC2</b>    | desmocollin 2                                     |
| <b>GJA1</b>    | gap junction protein alpha 1                      |
| <b>HEG1</b>    | heart development protein with EGF like domains 1 |
| <b>HIF1A</b>   | hypoxia inducible factor 1 subunit alpha          |
| <b>KLF15</b>   | Kruppel like factor 15                            |
| <b>KRT13</b>   | keratin 13                                        |
| <b>KRT32</b>   | keratin 32                                        |
| <b>KRT4</b>    | keratin 4                                         |
| <b>LBH</b>     | LBH regulator of WNT signaling pathway            |
| <b>MET</b>     | MET proto-oncogene, receptor tyrosine kinase      |
| <b>PALLD</b>   | palladin, cytoskeletal associated protein         |
| <b>PPL</b>     | periplakin                                        |
| <b>PTN</b>     | pleiotrophin                                      |
| <b>RAP2B</b>   | RAP2B, member of RAS oncogene family              |
| <b>SPRR1A</b>  | small proline rich protein 1A                     |
| <b>SPRR1B</b>  | small proline rich protein 1B                     |
| <b>SPRR3</b>   | small proline rich protein 3                      |
| <b>SULT2B1</b> | sulfotransferase family 2B member 1               |
| <b>TGM1</b>    | transglutaminase 1                                |
| <b>TGM3</b>    | transglutaminase 3                                |
| <b>TMEM79</b>  | transmembrane protein 79                          |
| <b>UPK1B</b>   | uroplakin 1B                                      |
| <b>ZFP36</b>   | ZFP36 ring finger protein                         |

**GO:0016477 - Cell Migration**

|                |                                                                  |
|----------------|------------------------------------------------------------------|
| <b>ADAMTS1</b> | ADAM metallopeptidase with thrombospondin type 1 motif 1         |
| <b>APCDD1</b>  | APC down-regulated 1                                             |
| <b>CAMSAP3</b> | calmodulin regulated spectrin associated protein family member 3 |
| <b>EDNRB</b>   | endothelin receptor type B                                       |
| <b>F2R</b>     | coagulation factor II thrombin receptor                          |
| <b>FN1</b>     | fibronectin 1                                                    |
| <b>GPLD1</b>   | glycosylphosphatidylinositol specific phospholipase D1           |
| <b>ITGAV</b>   | integrin subunit alpha V                                         |
| <b>LIMA1</b>   | LIM domain and actin binding 1                                   |
| <b>MEGF9</b>   | multiple EGF like domains 9                                      |
| <b>NR4A1</b>   | nuclear receptor subfamily 4 group A member 1                    |
| <b>NRP2</b>    | neuropilin 2                                                     |
| <b>NTN1</b>    | netrin 1                                                         |
| <b>PLAT</b>    | plasminogen activator, tissue type                               |
| <b>POSTN</b>   | periostin                                                        |
| <b>RND3</b>    | Rho family GTPase 3                                              |
| <b>SH3RF1</b>  | SH3 domain containing ring finger 1                              |
| <b>THBS1</b>   | thrombospondin 1                                                 |
| <b>WNT11</b>   | Wnt family member 11                                             |

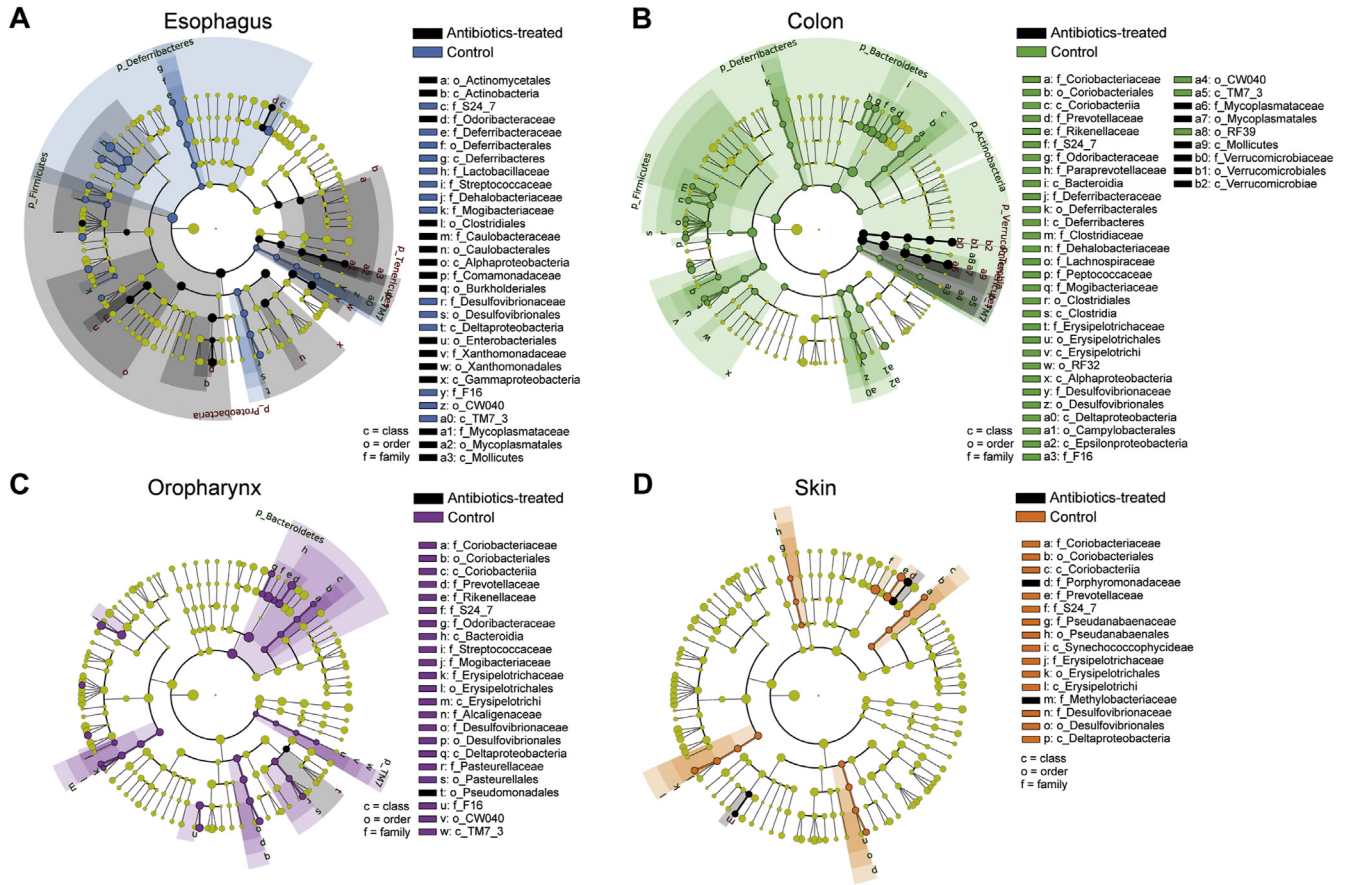

**Supplementary Figure 7.** Taxonomic composition of bacteria in antibiotics-treated mice. (A–D) LefSe analysis of taxa that are significantly enriched in microbiota samples at the indicated sites (esophagus, colon, oropharynx, or skin) from 8-week-old PHF SPF littermates treated with antibiotics or untreated controls. Kruskal-Wallis test was used in (A–D). LefSe, linear discriminant analysis effect size.

**Supplementary Figure 6.** Gene ontology (GO) functional enrichment analysis of genes differentially expressed due to colonization and EoE. Differentially expressed genes from esophageal biopsies of EoE compared with control individuals (eg, the human EoE transcriptome; Supplementary Table 6) were integrated with the genes that changed after colonization of GF mice with FMT. The murine PE and DE genes were intersected (Figure 4B; Supplementary Tables 2–3), and common and unique genes were analyzed with TOPPFUN (false discovery rate-adjusted  $P < .05$  and gene limit  $n \leq 2000$ ). The top representative, significantly enriched GO term with corresponding genes from input was summarized for each group. The complete GO functional analysis of gene groups is in Supplementary Table 7.
